# Supplementary material for: Pathogenic Microglia Orchestrate Neurotoxic Properties of Eomes-Expressing Helper T Cells
Source: MDPI journal article supplement (doi:10.3390/cells12060868), 2023-03-10
Supplement: s1 [file s1]

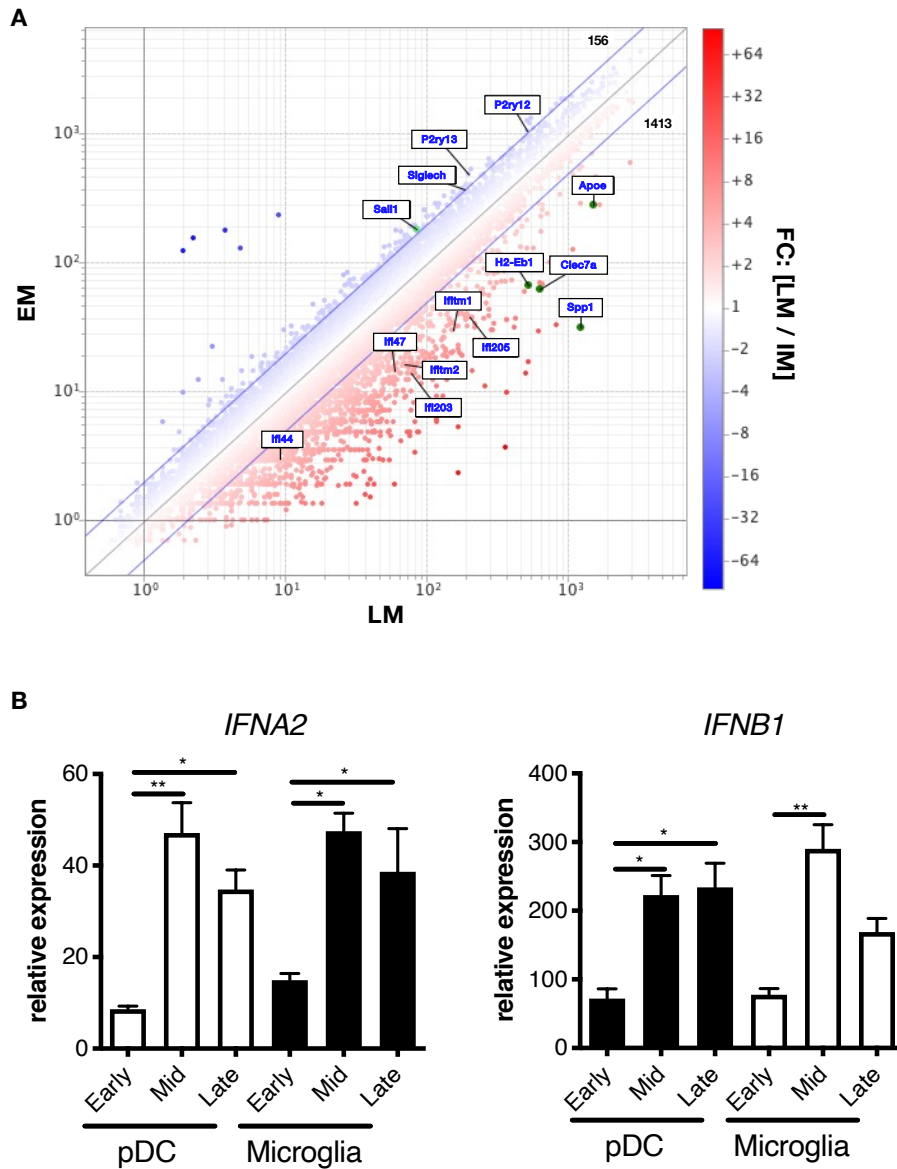

Supplementary Figure S1.

(A) Cx3cr1<sup>+</sup> CD45<sup>int</sup> microglia were isolated from CNS of EAE Cx3cr1-GFP mice for expression microarray analysis. Gene expression of EM and LM was compared and analyzed using a scatter plot. DEGs were highlighted by fold change  $\geq 2$ . (B) CNS PDCA-1<sup>+</sup> B220<sup>+</sup> pDC and CD45<sup>int</sup> CD11b<sup>+</sup> microglia were isolated from early, mid, and late phase of EAE by a FACS Aria II. The expression levels of *IFNA2*, and *IFNB1* were quantified by qPCR. The error bars show mean  $\pm$  SD. One-way ANOVA test with Dunnett's multiple comparisons test, \*,  $P < 0.05$ , \*\*,  $P < 0.01$ .

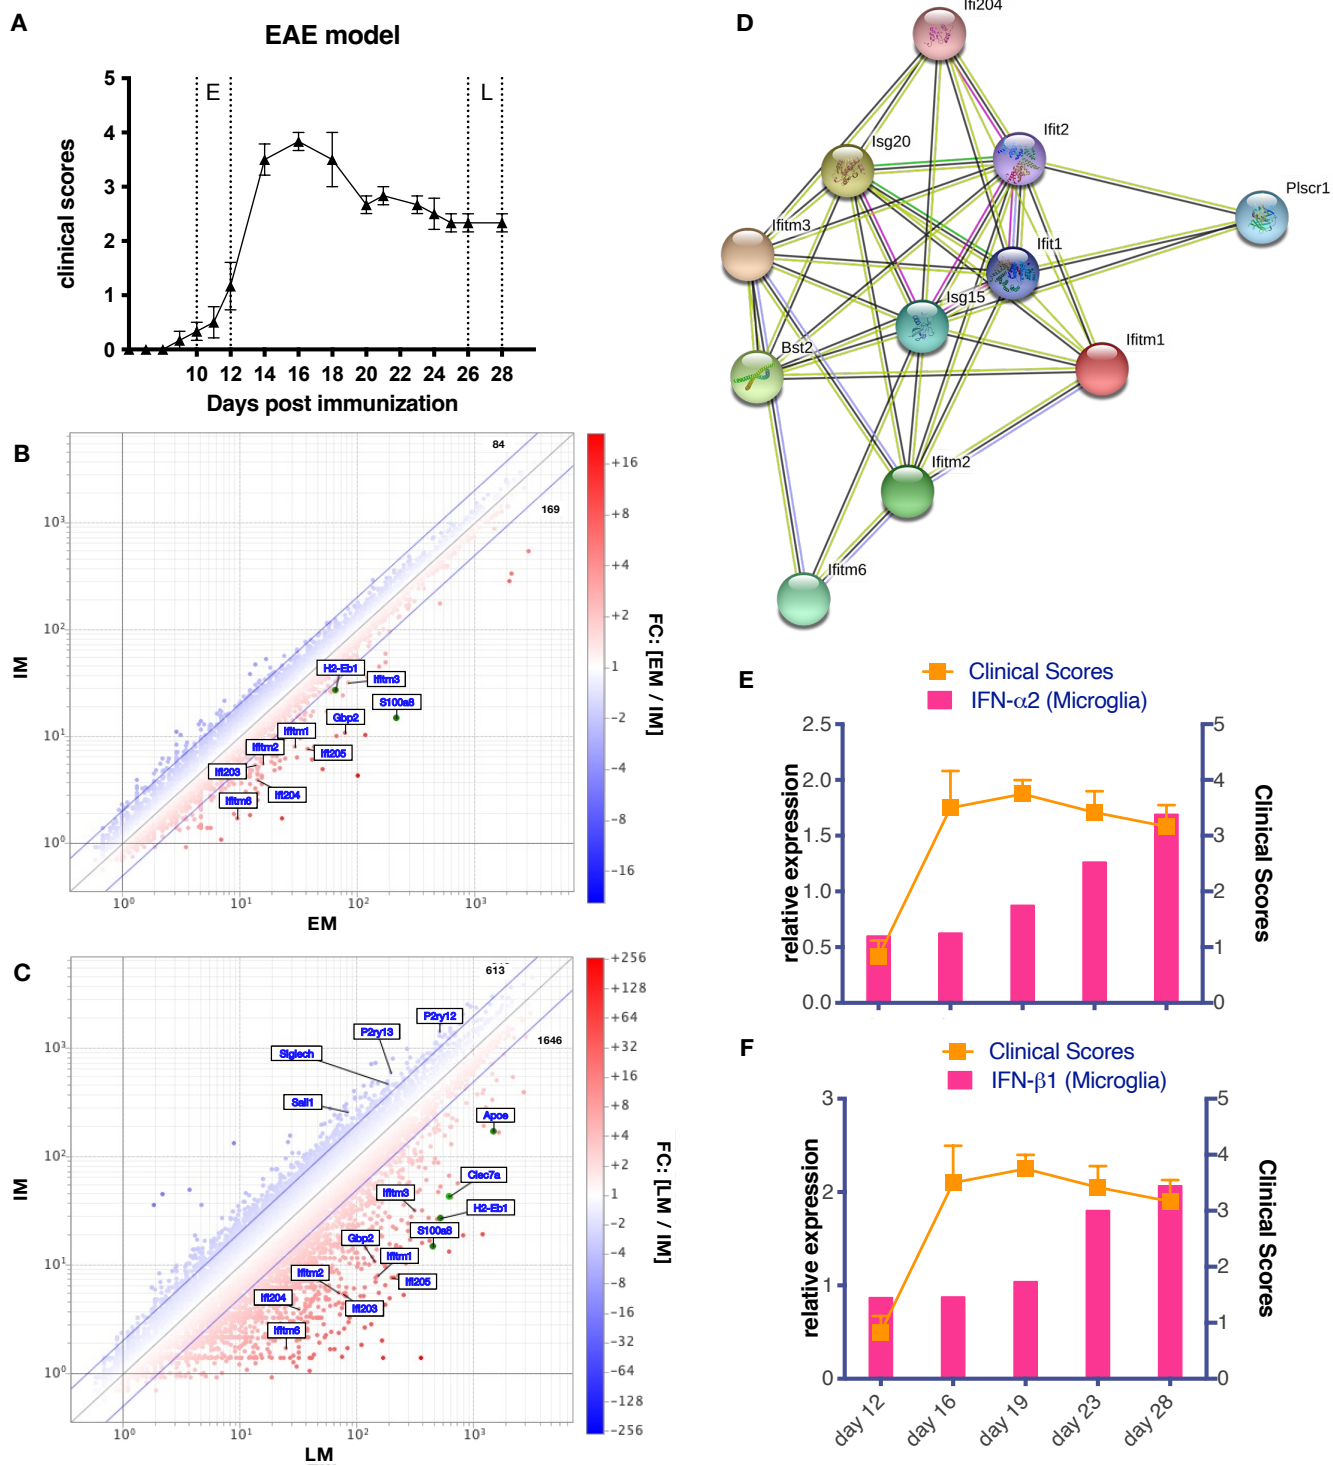

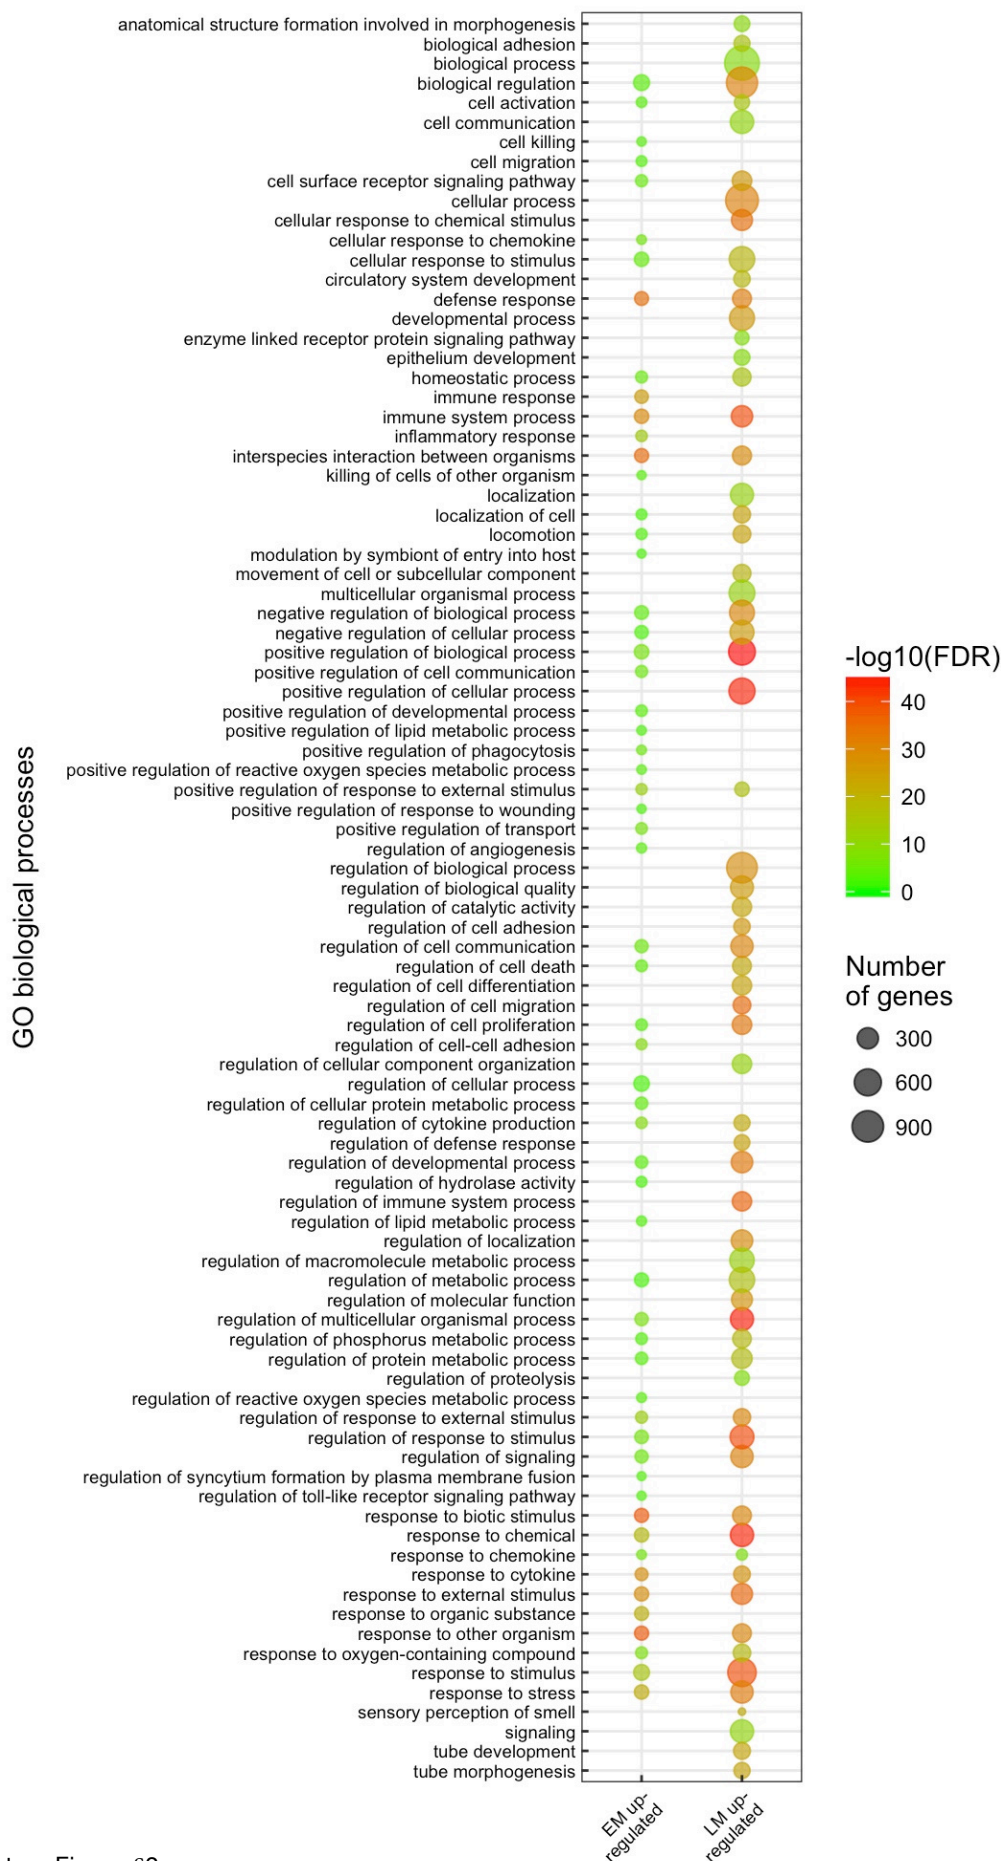

Supplementary Figure S2.

At different time points (intact, early, and late),  $\text{Cx3cr1}^+ \text{CD45}^{\text{int}}$  microglia were isolated from CNS of intact or EAE  $\text{Cx3cr1-GFP}$  mice for expression microarray analysis. Upregulated DEGs (EM vs. IM and LM vs. IM) were run GO analysis using PANTHER. The most significant upregulated 250 GO terms (EM vs. IM and LM vs. IM) were then screened by using REVIGO to remove redundant GO terms. The representative GO terms from EM vs. IM and LM vs. IM were selected by the dispensability  $< 0.7$ . The plot is generated by using ggplot2. The dot size indicates the number of DEGs associated with the process and the dot color indicates the significance of the enrichment ( $-\log_{10}(\text{FDR-corrected P-values})$ ). IM, intact microglia; EM, early EAE microglia; LM, late EAE microglia. See also Fig 2.

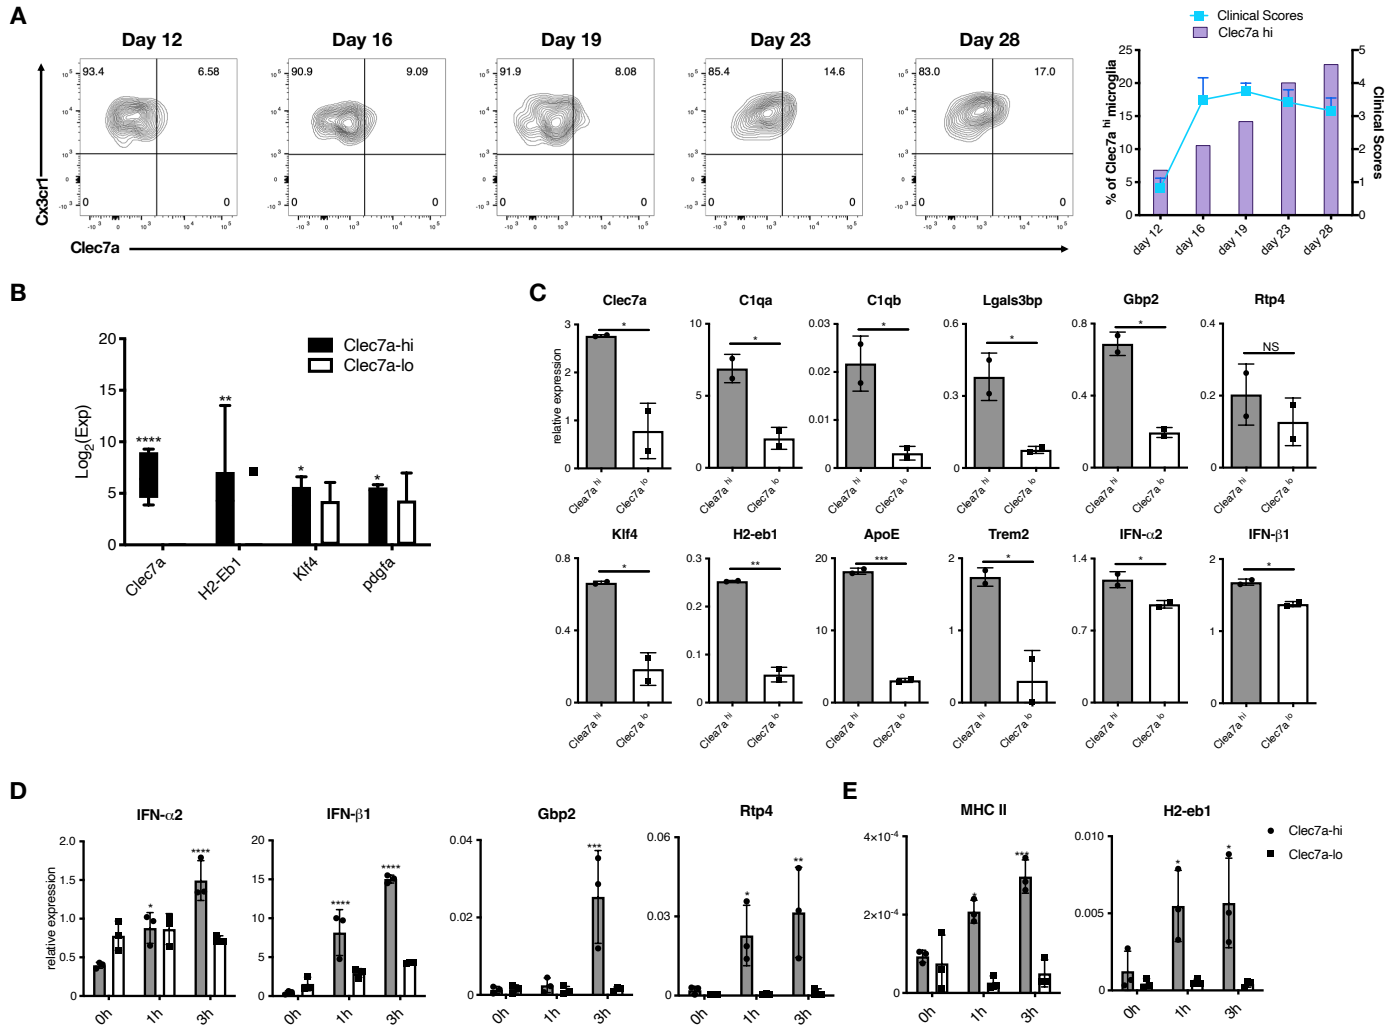

Supplementary Figure S3.

(A) The kinetic of Clec7a in microglia at different time points from EAE Cx3cr1-GFP mice was evaluated by FACS. Represented FACS plots is shown (left) and correlation with clinical score (right). Experiment was repeat performed three times, representative data is shown. (B) Cx3cr1<sup>+</sup> CD45<sup>int</sup> microglia from early EAE (Day 10-12 post immunization) were divided into Clec7a<sup>hi</sup> and Clec7a<sup>lo</sup> subsets. The expression of detected genes was shown by a bar graph. Error bars represent the mean  $\pm$  SD values. Student's *t*-test; \*,  $P < 0.05$ ; \*\*,  $P < 0.01$ ; \*\*\*\*,  $P < 0.0001$ . (C) Gene expression in sorted Clec7a<sup>hi</sup> and Clec7a<sup>lo</sup> microglia from late EAE (Day 26-28 post immunization) was determined by qPCR. Error bars represent the mean  $\pm$  SD values. Student's *t*-test; \*,  $P < 0.05$ ; \*\*,  $P < 0.01$ ; \*\*\*,  $P < 0.001$ . (D-E) Sorted Clec7a<sup>hi</sup> and Clec7a<sup>lo</sup> microglia from intact mice were stimulated with 10  $\mu$ g/ml Zymosan as indicated time in vitro. Gene expression was determined by qPCR. Error bars represent the mean  $\pm$  SD values; Statistic difference was determined by comparing with data of 0h, Student's *t*-test; \*,  $P < 0.05$ ; \*\*,  $P < 0.01$ ; \*\*\*,  $P < 0.001$ ; \*\*\*\*,  $P < 0.0001$ .

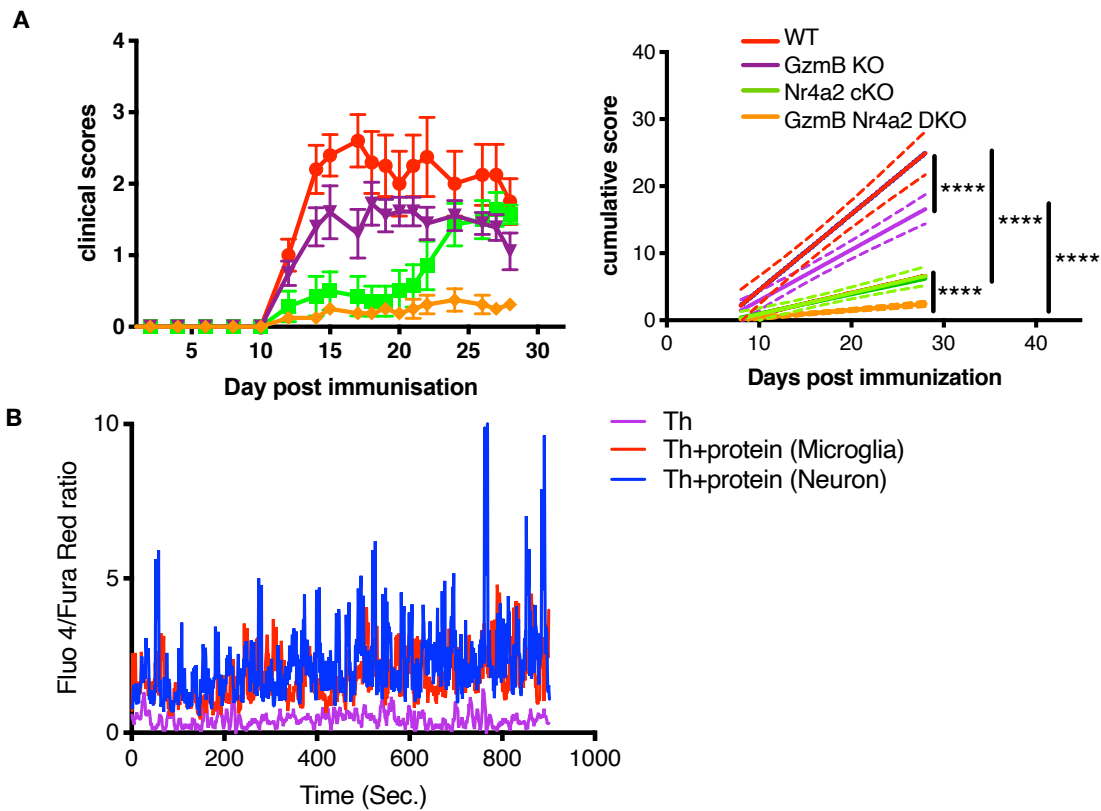

Supplementary Figure S4.

(A) Granzyme B Nr4a2 DKO, Granzyme B KO, Nr4a2 cKO and WT were immunized with MOG<sub>35-55</sub>. Clinical EAE scores are shown via error bars representing SEM (left). In the right panel, solid lines represent cumulative disease scores; dashed lines indicate the 95% confidence intervals; linear regression analysis; \*\*\*\*,  $P < 0.0001$ . (B) Neuron and microglia were isolated from late EAE mice. Protein then was purified using AllPrep DNA/RNA/Protein Mini Kit (Qiagen). Sorted WT CNS Th cells from peak EAE were stimulated by antigen-loaded (neuron protein / microglia protein) BMDCs. The  $\text{Ca}^{2+}$  flux of CNS Th cells was measured by a FACS Canto II, the liner graph is shown as ratio of Fluo-4 vs. Fura-Red.





A

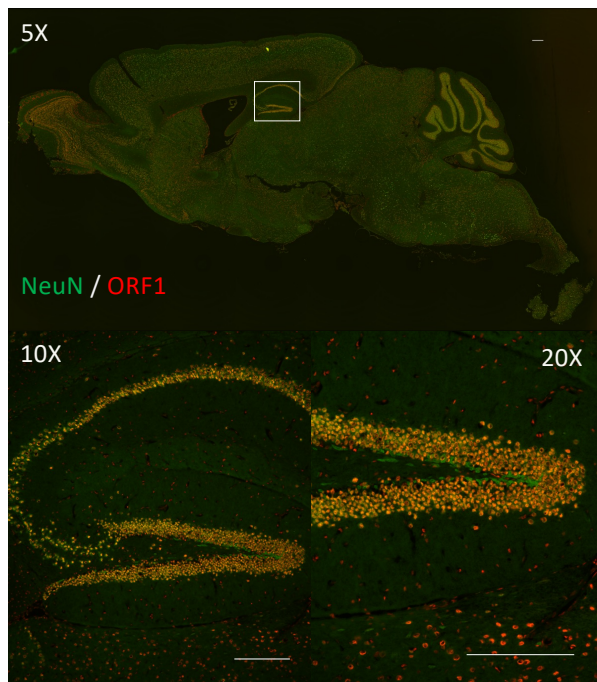

B

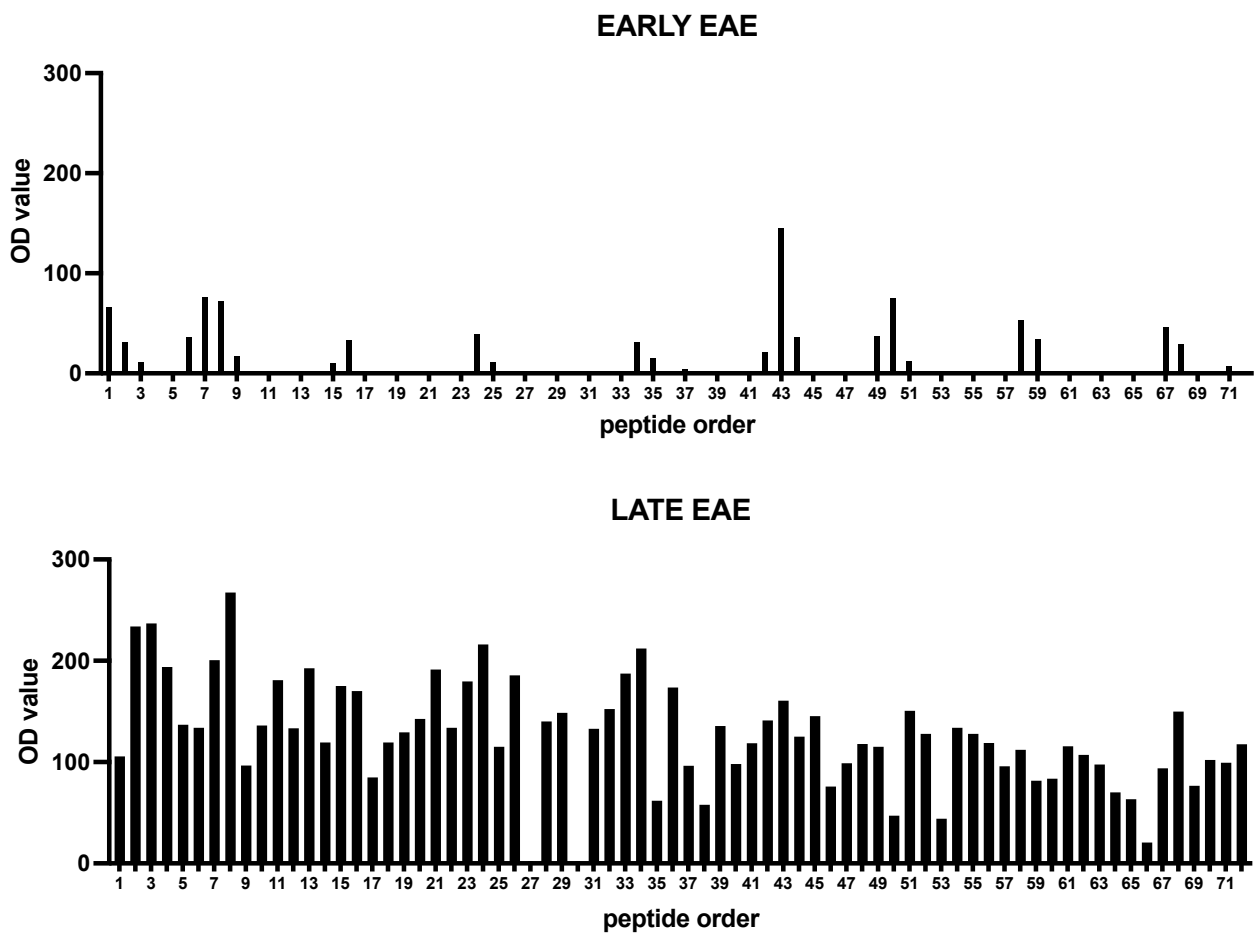

Supplementary Figure S6.

(A) The histology image of late EAE (Day 26-28 post immunization) brain section stained by anti-neuron, anti-ORF1. (B) The sorted CNS Th cells from early (Day 10-12 post immunization) or late EAE (Day 26-28 post immunization) were shortly co-cultured with BMDCs that were pulsed with synthesized ORF-1 peptide library. The  $\text{Ca}^{2+}$  flux of CNS Th cells was detected and shown as bar graphs determined by  $\text{OD}_{510}$  value. Two peptides were missed. See also the Method section.

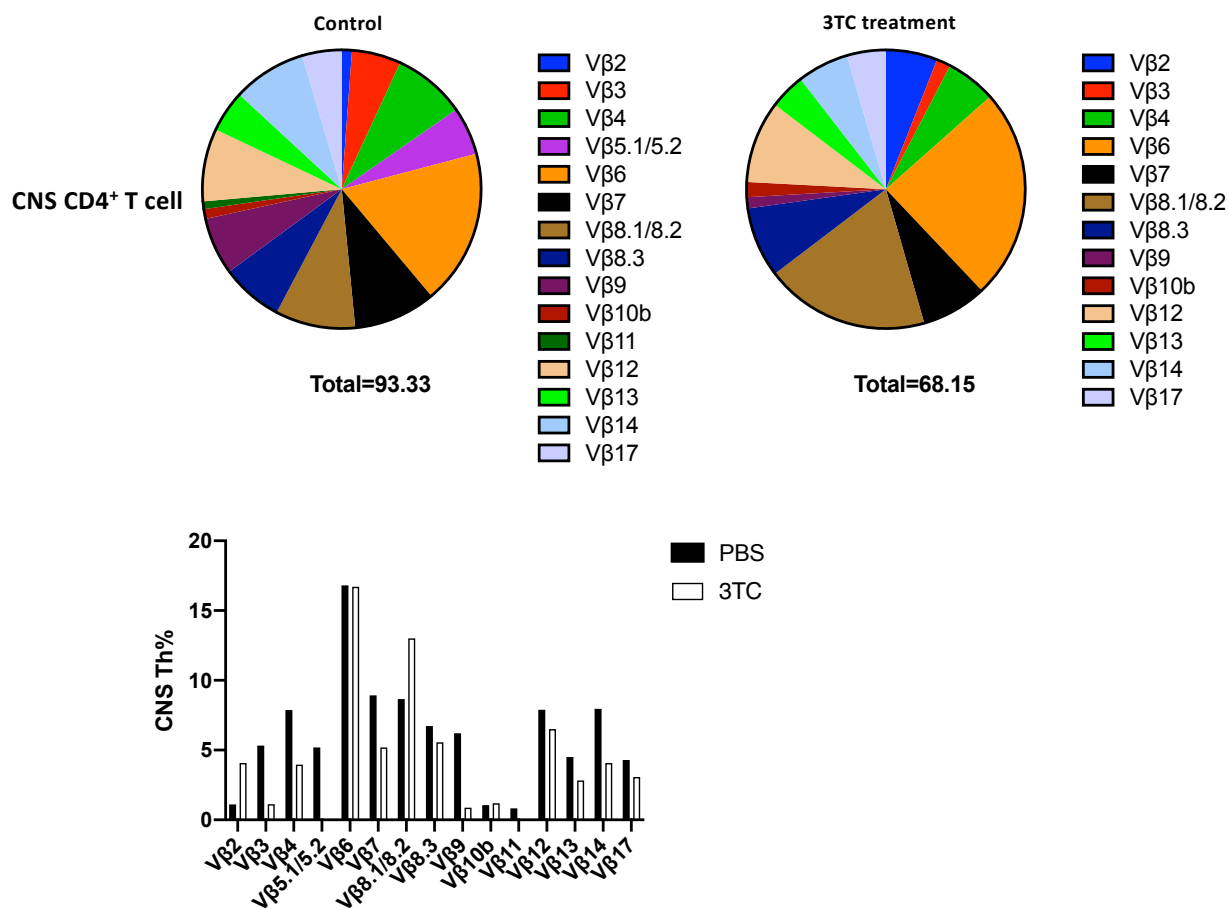

Supplementary Figure S7.

Sorted CNS Th cells from control and 3TC treated EAE mice were surface stained using mouse Vβ T CR screen panel kit. Then intracellular staining was performed against Eomes. Percentages of each Vβ subset among Eomes<sup>+</sup> and Eomes<sup>-</sup> CD4<sup>+</sup> T cells are summarized and shown in pie graphs (top) and a bar graph (bottom).



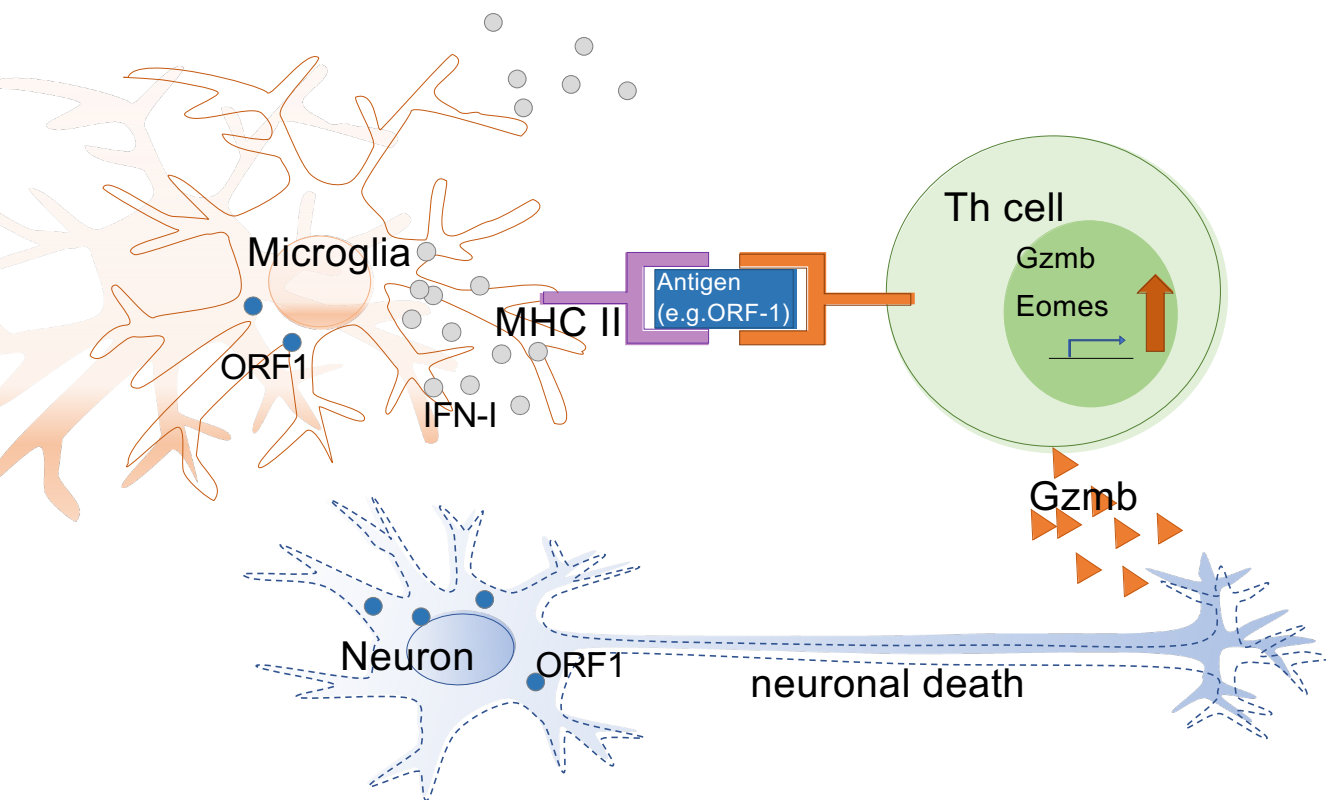

Supplementary Figure S8.

Scheme of suggested hypothetical process of neurodegeneration. See the text also.

LINE-1 ORF1derived peptide

|    |                  |    |                  |
|----|------------------|----|------------------|
| 1  | MAKGKRRNLNLRNQD  | 37 | NIQEIQDTIRRPNVR  |
| 2  | RRNLNLRNQDHSPSP  | 38 | QDTIRRPNVRIIGVD  |
| 3  | NRNQDHSPSPEPSIP  | 39 | RPNVRIIGVDENEDF  |
| 4  | HSPSPEPSIPTSPSP  | 40 | IIGVDENEDFQLKGP  |
| 5  | EPSIPTSPSPGNPNT  | 41 | ENEDFQLKGPKEIEE  |
| 6  | TSPSPGNPNTPENLD  | 42 | QLKGPKEIEEANIFN  |
| 7  | GNPNTPENLDLKLKA  | 43 | ANIFNKEIEENFPNL  |
| 8  | PENLDLKLKAYLMMM  | 44 | KIEENFPNLKNEMH   |
| 9  | LDLKLKAYLMMVEDIK | 45 | NFPNLKNEMHMNIQE  |
| 10 | YLMMMVEDIKKDFNK  | 46 | KNEMHMNIQEAYRTP  |
| 11 | VEDIKKDFNKSLKEI  | 47 | MNIQEAYRTPNRLDQ  |
| 12 | KDFNKSLKEIQENTA  | 48 | AYRTPNRLDQKRNS   |
| 13 | SLKEIQENTAKELQV  | 49 | NRLDQKRNSSRHIII  |
| 14 | QENTAKELQVLKEKQ  | 50 | KRNSSRHIIIRTSNA  |
| 15 | KELQVLKEKQENTIK  | 51 | RHIIIRTSNALNKDR  |
| 16 | LKEKQENTIKQVEVL  | 52 | RTSNALNKDRILKAV  |
| 17 | ENTIKQVEVLTEKEE  | 53 | LNKDRILKAVREKQ   |
| 18 | QVEVLTEKEEKTYKQ  | 54 | ILKAVREKQVQTYKG  |
| 19 | TEKEEKTYKQVMEMN  | 55 | REKQVQTYKGKPIRI  |
| 20 | KTYKQVMEMNKTILD  | 56 | VQTYKGKPIRITPDFS |
| 21 | VMEMNKTILDLKREV  | 57 | KPIRITPDFSPETMK  |
| 22 | KTILDLKREVDTIKK  | 58 | TPDFSPETMKARRAW  |
| 23 | LKREVDTIKKTQSEA  | 59 | PETMKARRAWTDVIQ  |
| 24 | DTIKKTQSEATLEIE  | 60 | ARRAWTDVIQTLREH  |
| 25 | TQSEATLEIETLGKK  | 61 | TDVIQTLREHKLQPR  |
| 26 | TLEIETLGKKLSISN  | 62 | TLREHKLQPRLLYP   |
| 27 | TLGKKSGTIDLSISN  | 63 | KLQPRLLYPAKLSII  |
| 28 | SGTIDLSISNRIQEM  | 64 | LLYPAKLSIIIEGET  |
| 29 | LSISNRIQEMGAEDS  | 65 | KLSIIIEGETKVFHD  |
| 30 | RIQEMEERISGAEDS  | 66 | IEGETKVFHDKTKFT  |
| 31 | EERISGAEDSIENIG  | 67 | KVFHDKTKFTHYLST  |
| 32 | GAEDSIENIGTTIKE  | 68 | KTKFTHYLSTNPALQ  |
| 33 | IENIGTTIKENGKCK  | 69 | HYLSTNPALQRIITE  |
| 34 | TTIKENGKCKKILTQ  | 70 | NPALQRIITEKNQYK  |
| 35 | NGKCKKILTQNIQEI  | 71 | RIITEKNQYKNGNNA  |
| 36 | KILTQNIQEIQDTIR  | 72 | KNQYKNGNNALEKTRR |

Supplemental Table. S1.

ORF-1 peptide library. An ORF-1 peptide library contains 72 overlapping peptides (length: 15 amino acids, offset: 5 amino acids, purity 70%, 1-3 mg/peptide)

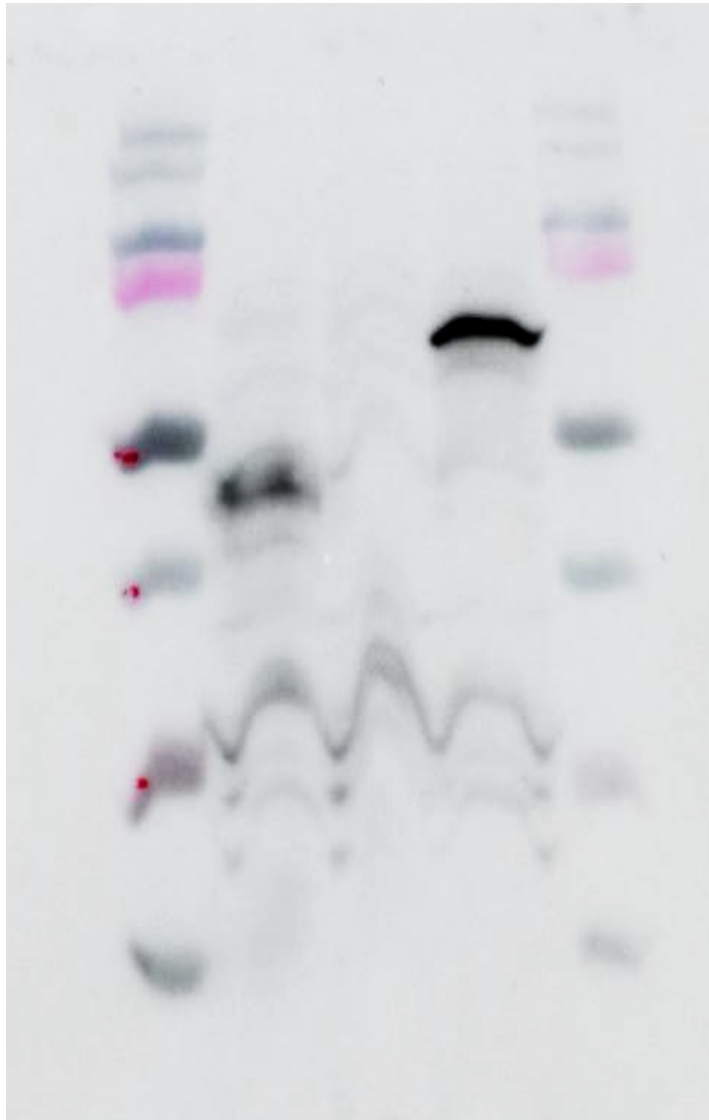

**Full unedited gel for Figure 6B**  
**Lane 1: marker**  
**Lane 2: ORF1**  
**Lane 3: Mock**  
**Lane 4: Luciferase**  
**Lane 5: marker**  
**Lane 1 to 3 are cropped and used for fig 6B**
